# Supplementary material
Source: PubMed Central journal article supplement (PMC5985016)
Supplement: mmc1.pdf [file mmc1.pdf]

**Biophysical Journal, Volume 114**

**Supplemental Information**

**FRET Image Correlation Spectroscopy Reveals RNAPII-Independent P-TEFb Recruitment on Chromatin**

**Gabriel Bidaux, Corentin Le Nézet, Mariano Gonzalez Pisfil, Mélanie Henry, Alessandro Furlan, Oliver Bensaude, Bernard Vandenbunder, and Laurent Héliot**

**TABLE S1**

|                                      | 5'-forward-3'                                            | 5'-reverse-3'                               |
|--------------------------------------|----------------------------------------------------------|---------------------------------------------|
| <b>Cloning</b>                       |                                                          |                                             |
| CT1 <sup>wt</sup> -<br>VLL-<br>XFP-N | GATCCCGCGGTGAGGGAGAGAGGAAGAACAACA                        | AGTCGCGGCCGCCTACTTAGGAAGGGG<br>TGGAAGTGG    |
| CT1 <sup>wt</sup> -<br>VLL-<br>XFP-C | GATCGCTAGCCGCCACCATGGAGGGAGAGAGGAAGA<br>ACAACA           | GATCACCGGTCTTAGGAAGGGGTGGAA<br>GTGGTG       |
| CT1 <sup>wt</sup> /<br>LL-<br>XFP-N  | GATCCCGCGGTGGTCCAAAAAAGAAGAGAAAGGTAGG<br>A               | AGTCGCGGCCGCCTACTTAGGAAGGGG<br>TGGAAGTGG    |
| CT1 <sup>wt</sup> -<br>VLL-<br>XFP-C | GATCGCTAGCCGCCACCATGGGTCCAAAAAAGAAGAG<br>AAAGGTAGGATCCAT | GATCACCGGTCTTAGGAAGGGGTGGAA<br>GTGGTG       |
| RPB1-<br>VLL-<br>XFP-C               | GATCGCTAGCCGCCACCATGCACGGGGGTGGCCC                       | GATCACCGGTTCTAGCGTTCTCCTCGTC<br>ACTGTC      |
| RPB1-<br>VLL-<br>XFP-N               | GATCCCGCGGTCACGGGGGTGGCCCC                               | AGTCGCGGCCGCTTATCTAGCGTTCTCC<br>TCGTCACTGTC |

Table S1: Oligonucleotides used for gene or cDNA cloning.

**SUPPLEMENTAL FIGURE LEGENDS.**

**FIGURE S1.** *Optimization of FRET fluorescent pair and structure of fluorescent chimeras.* **A**, The standardization of the process to build fluorescent fusion proteins and its rationalization to optimize FRET was achieved by the creation of a directed cloning site instead of the standard multicloning site of the pGFP-N vector. This directed cloning site includes a 5' pair of restriction sites (Nhe I / Age I) and a 3' pair of restriction sites (Sac II / Not I) which surround a linker sequence. This linker encodes a 42 AA peptide which can be reduced to either 22 AA or 12 AA by a single restriction of the vector with BstE II or SgrA I, respectively. This vector is dubbed variable length linker plasmid (pVLL). **B**, Chart summarizing results of frequency-domain FLIM experiments performed in U2OS cells transfected with pVLL vectors expressing either mT2, CT1-mT2 or RPB1-SYFP2 linked at the N or C terminal part. The effect of the three different lengths of VLL on FRET efficiency was also evaluated. Controls with non-fused pairs are presented and mT2 alone as well. a, b, c, d: significance reached ( $p < 0.05$ ) with the respective control (grey bars). Values represent Mean phase lifetime ( $\tau_\phi$ )  $\pm$  SD. **C**, Comparison of FRET efficiency of both fluorescent pairs: mTurquoise2 / SYFP2 and mTurquoise2 / Reach2 as determined by FLIM-FRET in U2OS cells. Fluorescent pairs expressed concomitantly (i.e. mTurquoise2 + SYFP2) have been compared with fluorescent pairs fused in frame in the pVLL vector (i.e. SYFP2-VLL-mTurquoise2) and separated with linkers of different lengths (12, 22 or 42 amino acids). Fluorescence lifetime was assessed by frequency-domain FLIM imaging. Significant was considered for  $p < 0.05$ ; a: significantly different from the average lifetime distribution of mT2 expressing cells, b: significantly different from the average lifetime distribution of mT2 / SYFP2 homologue pair. **D**, Theoretical graph plot showing the relation between the FRET efficiency ( $E_{\text{FRET}}$ ; %) and the distance between acceptor and donor of FRET. The Förster radius,  $R_0$ , extracted from literature (15-18, 39) is calculated as explained in the method section. Among several acceptor-donor pairs, mTurquoise2 – Reach2 appears as the best performer.

**FIGURE S2.** *Variance in daily measurement of lifetime and between different chimeric donor of fluorescence.* **A**, Graph plot shows the residuals of CT1-mT2 lifetime in 25 independent experiments. **B**, Median values of the average lifetime of CT1 $_{wt}$ , CT1 $\Delta$ (503-533) or CT1 $\Delta$ (480-551) from different experiments. Bars: mean $\pm$ SD.

**FIGURE S3.** *Characterization and denoising of lifetime images.* **A**, Lifetime image of mT2 protein (top row) expressed in U2OS (left image) was filtered by a 1-pixel sliding binning along x/y directions

(middle image) or 2-pixel binning (right image). Extra-nuclear pixels were excluded from analysis (dark area). **B**, same as A for a cell expressing CT1-mT2 and H2A-Reach.

**FIGURE S4.** *Example of a dataset of simulated images generated to evaluate the error in calculated cluster surface area and cluster density.* 1 representative image over 20 is shown for each condition of cluster surface area and cluster density. Cluster shape: square.

**FIGURE S5.** *Evaluation of the correction of the calculated cluster density.* **A**, Graph plot showing the error in calculated cluster density as a function of particle density, with or without correction. **B**, Graph plot showing the residuals of the regression analysis of the two populations as a function of particle density, with or without correction.

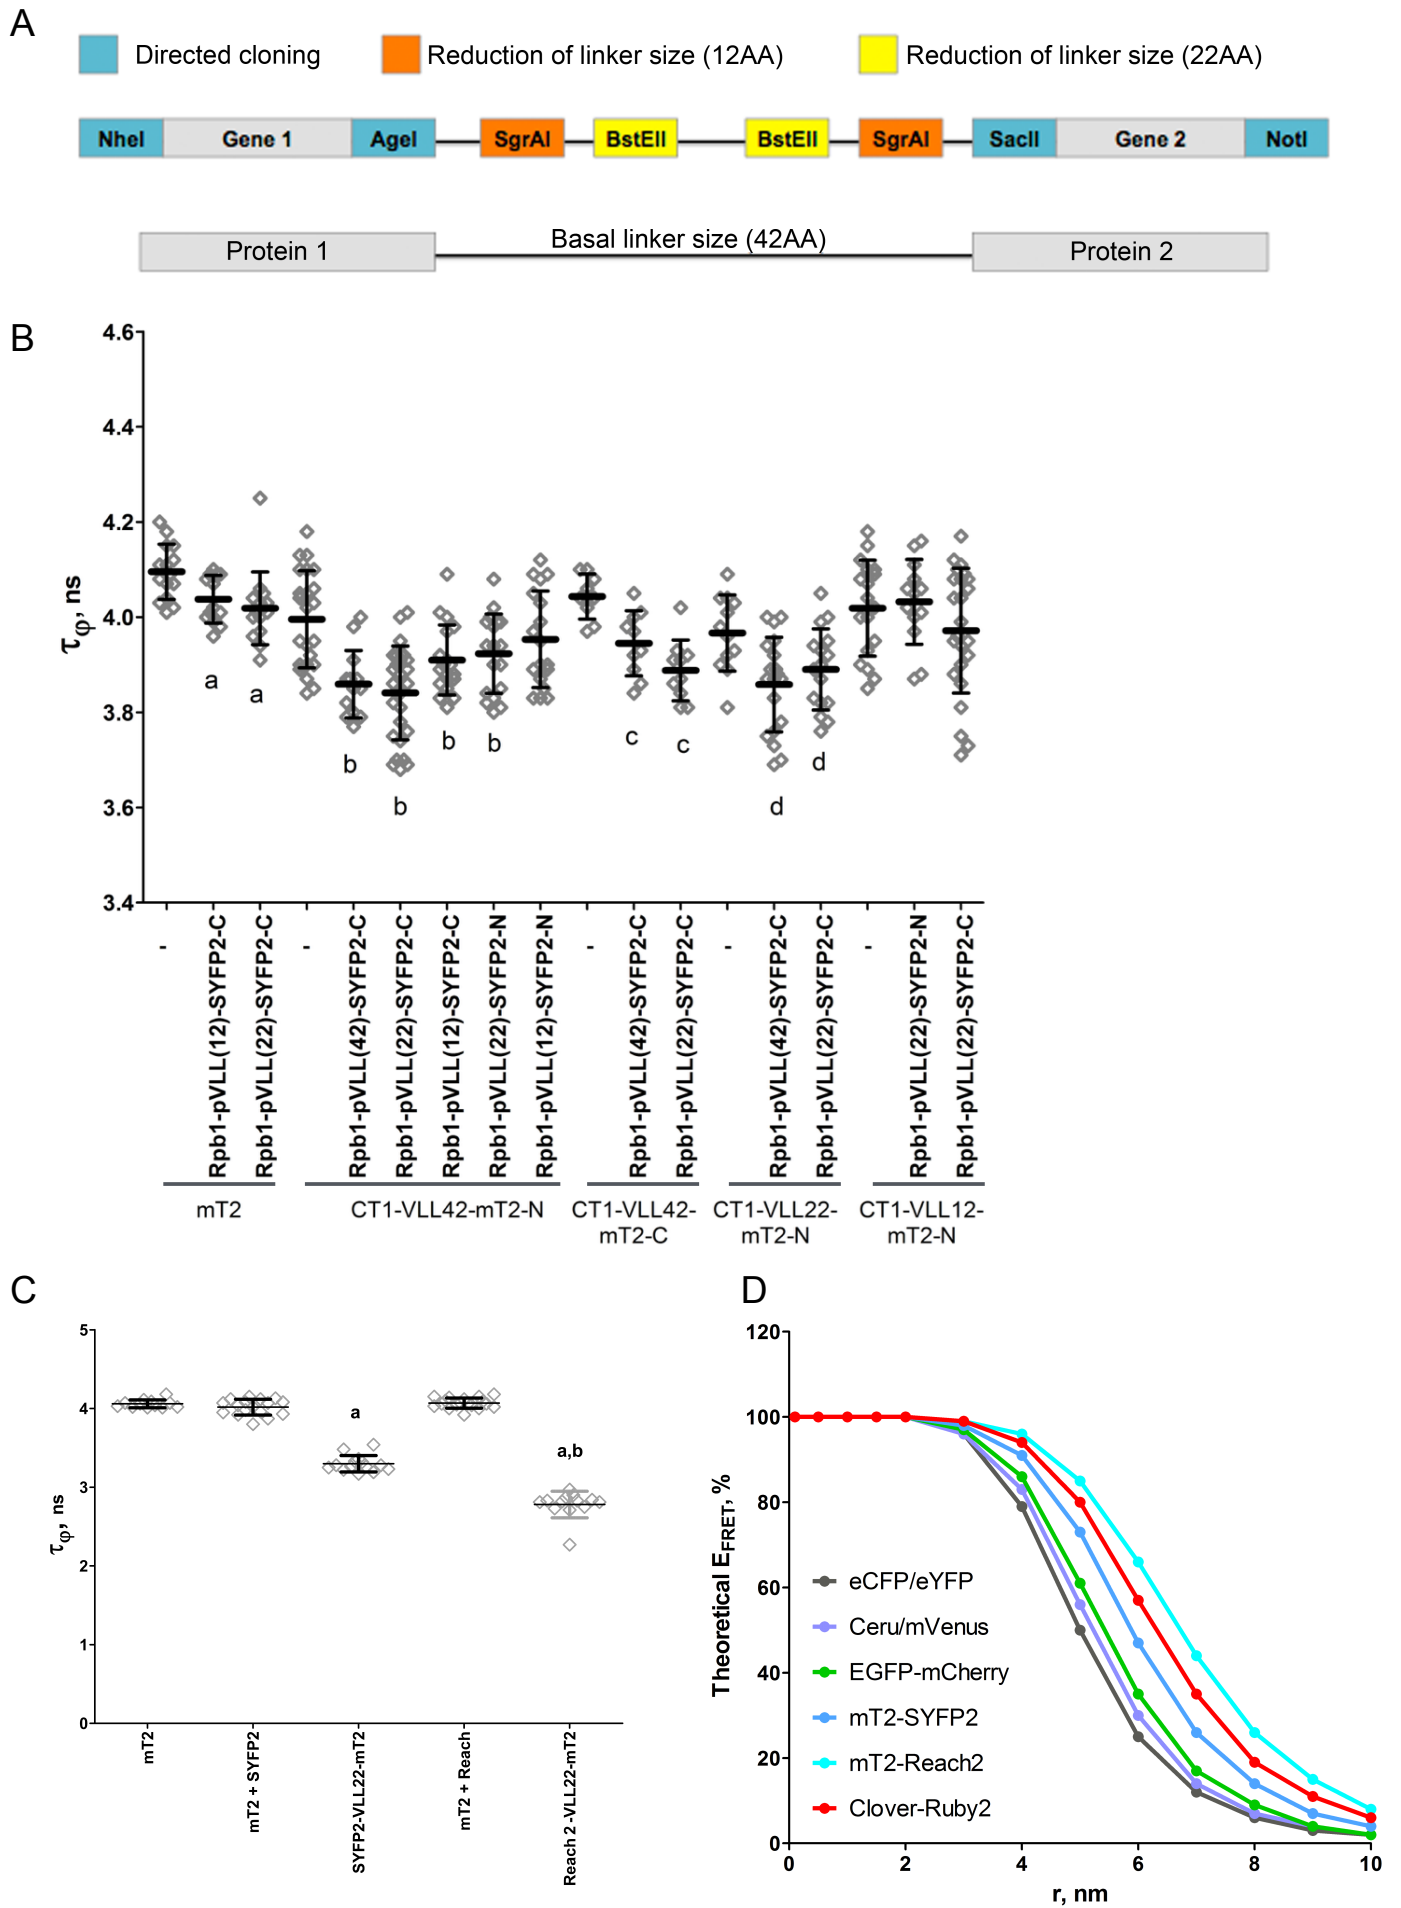

Fig S1

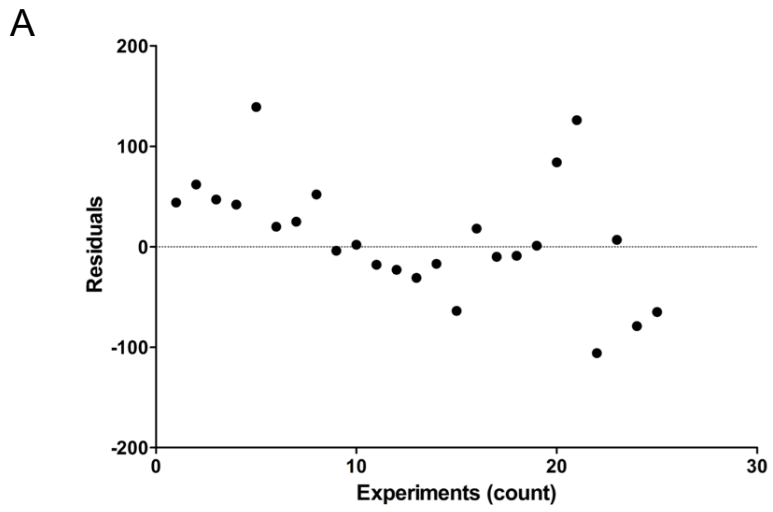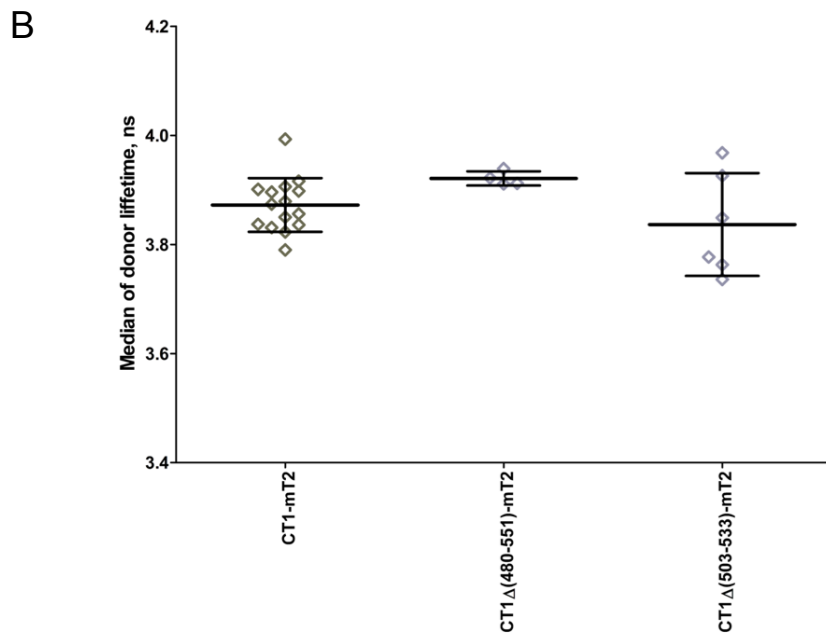

Fig S2

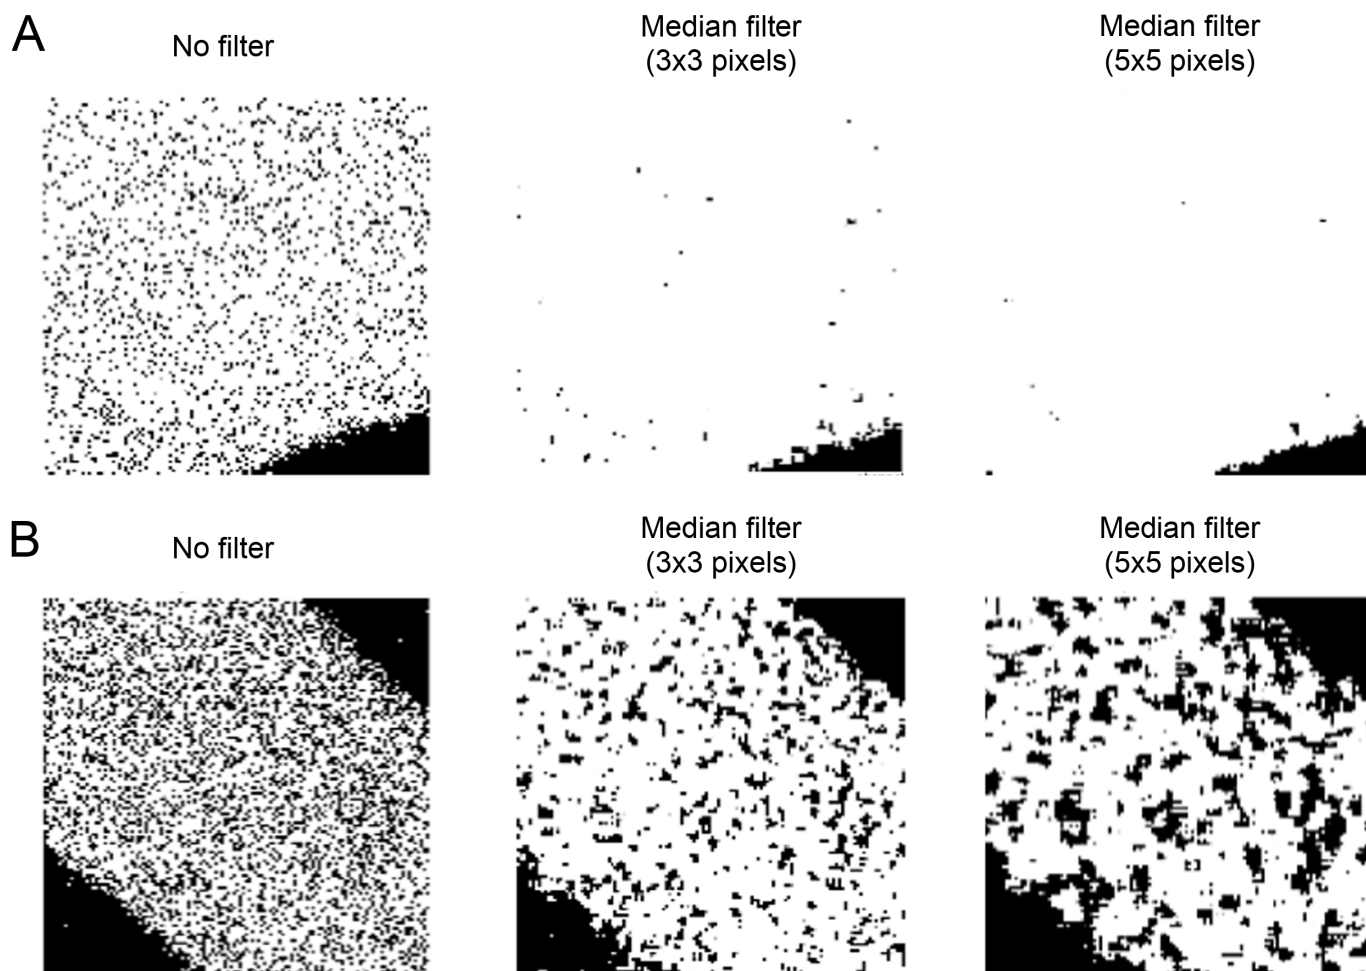

Fig S3

A

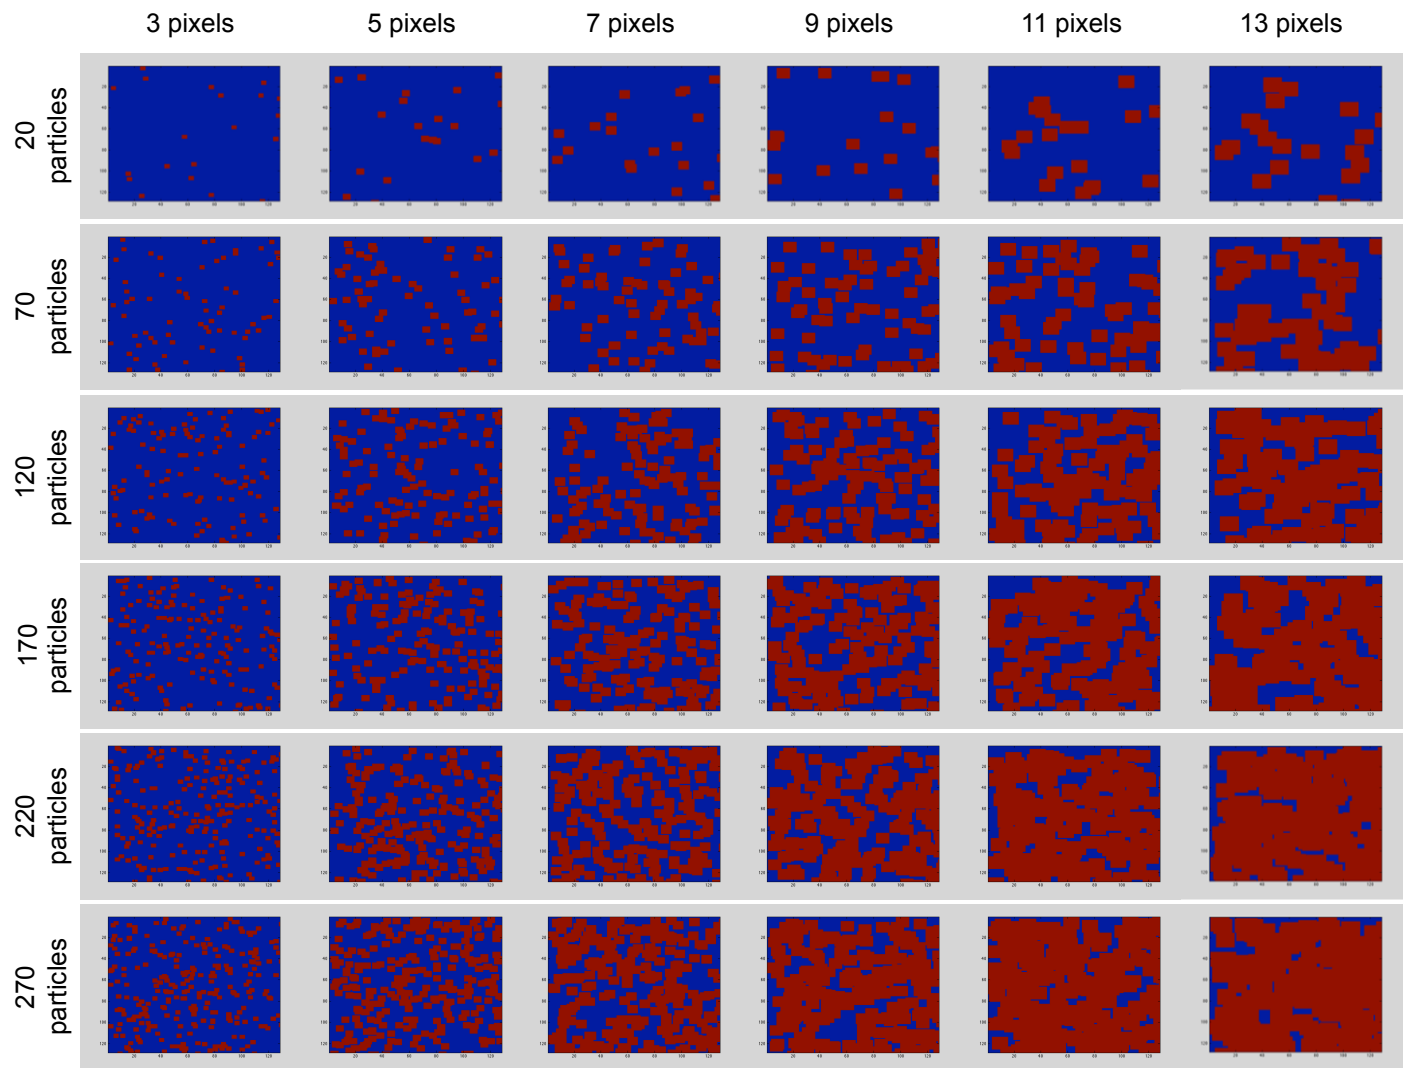

Fig S4



A

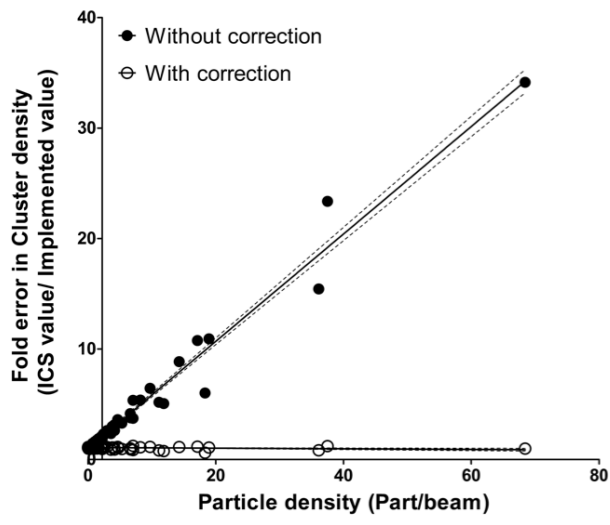

B

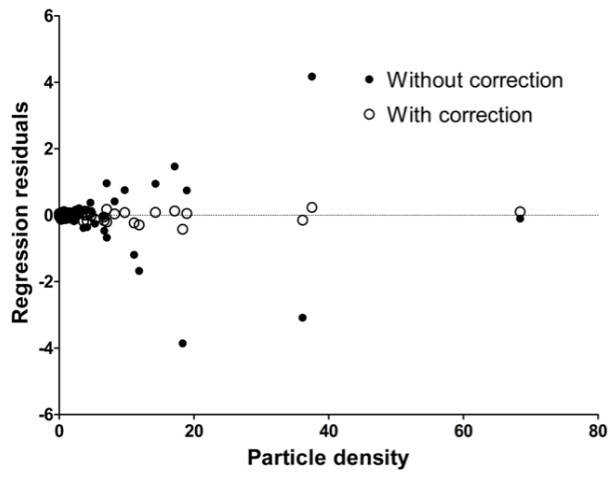

Fig S5
